# Supplementary material for: Tracing the evolution of morphology and mixing state of sootparticles along with the movement of an Asian dust storm
Source: Copernicus journal article supplement (doi:10.5194/acp-2020-539), 2020-07-01
Supplement: Supplementary file 1 [file acp-2020-539-supplement.pdf]

Supporting Information for

**Tracing the evolution of morphology and mixing state of soot particles along with the movement of an Asian dust storm**

Liang Xu<sup>1</sup>, Satoshi Fukushima<sup>2</sup>, Sophie Sobanska<sup>3</sup>, Kotaro Murata<sup>2</sup>, Ayumi Naganuma<sup>2</sup>, Lei Liu<sup>1</sup>,  
Yuanyuan Wang<sup>1</sup>, Hongya Niu<sup>4</sup>, Zongbo Shi<sup>5</sup>, Tomoko Kojima<sup>6</sup>, Daizhou Zhang<sup>2</sup>, Weijun Li<sup>1,\*</sup>

<sup>1</sup>Department of Atmospheric Sciences, School of Earth Sciences, Zhejiang University, Hangzhou  
310027, China

<sup>2</sup>Faculty of Environmental and Symbiotic Sciences, Prefectural University of Kumamoto,  
Kumamoto 862-8502, Japan

<sup>3</sup>Institute of Molecular Sciences, UMR CNRS 5255, University of Bordeaux, 351 cours de la  
libération, 33405 Talence, France

<sup>4</sup>Key Laboratory of Resource Exploration Research of Hebei Province, Hebei University of  
Engineering, Handan 056038, Hebei, China

<sup>5</sup>School of Geography, Earth and Environmental Sciences, University of Birmingham, UK

<sup>6</sup>Department Earth and Environmental Science, Faculty of Advanced Science and Technology,  
Kumamoto University, Kumamoto 860-8555, Japan

**Contents of this file**

Table S1, Figures S1 to S6

## 1. Information about samples and the Asian dust storm event

Table S1. Detailed information about sampling dates, times, meteorological conditions, and PM concentrations for samples.

|              | Sample ID | Date | Sampling Time<br>(BJT, UTC+8) | Sampling duration<br>Second | Temp<br>°C | RH<br>% | Pressure<br>hPa | Wind Direction<br>° | Wind speed<br>m/s | PM <sub>10</sub> /<br>PM <sub>2.5</sub><br>µg/m <sup>3</sup> | Particle No. |
|--------------|-----------|------|-------------------------------|-----------------------------|------------|---------|-----------------|---------------------|-------------------|--------------------------------------------------------------|--------------|
| Jinan (T1)   | dust-1    | 3-18 | 10:27                         | 60                          | -          | -       | -               | 179                 | 3.9               |                                                              |              |
|              | dust-2    | 3-18 | 10:28                         | 50                          | -          | -       | -               | 357                 | 2.4               | 526/98                                                       | 412          |
|              | dust-3    | 3-18 | 10:40                         | 100                         | -          | -       | -               | 89                  | 1.7               |                                                              |              |
| Qingdao (T2) | dust-1    | 3-18 | 7:54                          | 90                          | 12.5       | 49.5    | 1013.3          | 278                 | 0.7               | 490/140                                                      | 486          |
|              | dust-2    | 3-18 | 20:00                         | 120                         | 8.4        | 79.3    | 1013.6          | 162                 | 1.3               | 153/55                                                       |              |
| Amakusa (T3) | dust-1    | 3-18 | 23:16                         | 120                         | 16.2       | 85.1    | 1013            | 121                 | 1.1               | 63/52                                                        | 887          |
|              | dust-2    | 3-19 | 6:36                          | 60                          | 13.7       | 92.2    | 1012.6          | 358                 | 0.6               | 54/47                                                        |              |

The dust total concentration in Figure S1 clearly shows that at 08:00 on 2014/03/18 (BJT, UTC+8), the dust storm has already passed T1 and T2, heading eastwards (wind arrows) to reach T3. The mean sea level pressure and wind vectors in Figure S2 could also confirm the movement of this high pressure system (yellow) on 03/17, 03/18, and 03/19.

The air behind a cold front is colder and drier than the air in front. When the cold front passes through, the RH and temperature can drop, and the pressure can increase. Based on this and Figure S3-S5, we can define the time of the cold front passage. The cold front arrived T1 around 14:00 on 03/17, T2 at 17:00 on 03/17, and T3 at 17:00 on 03/18 (BJT, UTC+8). This is consistent with the arrival time derived from the PM concentration in Figure 1b.

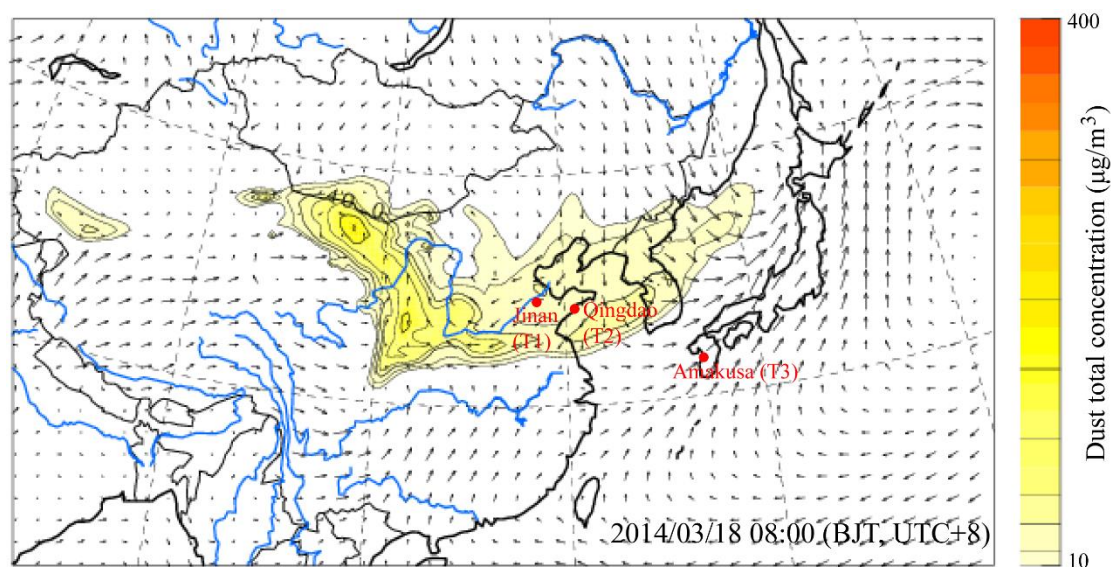

Figure S1. Distributions of dust in East Asian region at 2014/03/18. Data is provided by the National Institute for Environment Studies and Kyushu University (<http://www-cfors.nies.go.jp/~cfors/>).

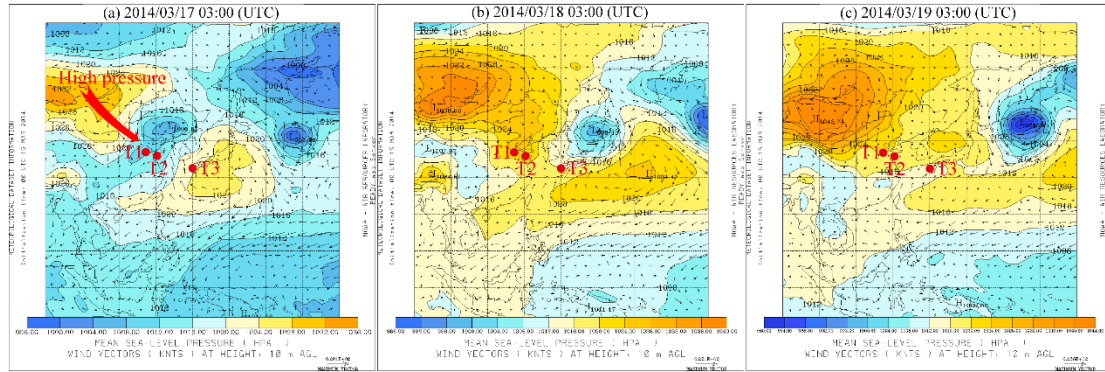

Figure S2. The mean sea level pressure (hPa) and wind vectors (knots) at 03/17, 03/18, and 03/19 at the three sampling sites. Data source: NOAA Air Resources Laboratory's (ARL) Real-time Environmental Applications and Display sYstem (READY) (Rolph et al., 2017).

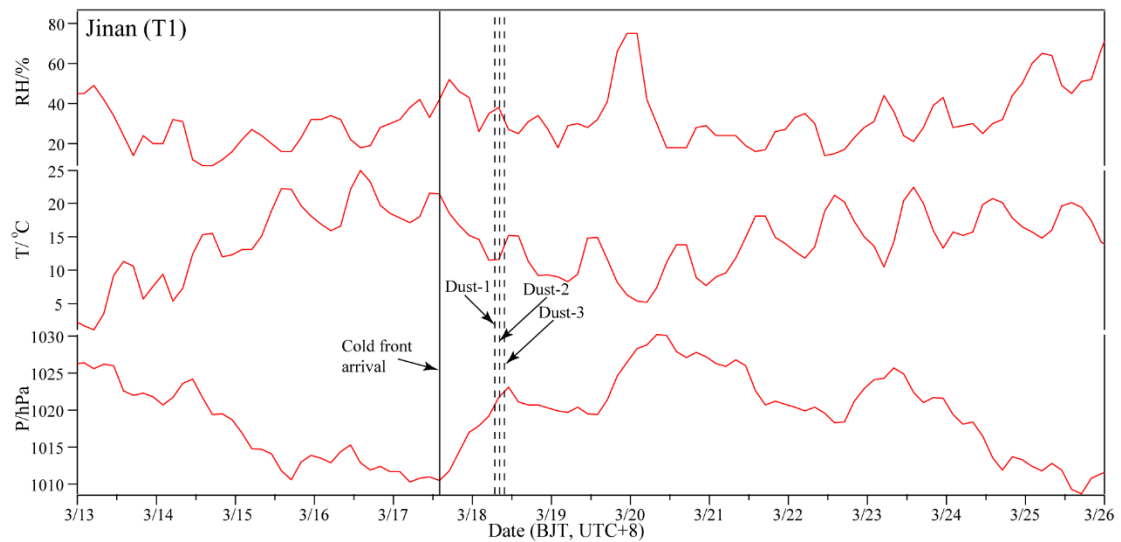

Figure S3. Time series of surface weather conditions: relative humidity (RH), temperature (T), and pressure (P) at Jinan (T1). The start time of the cold front passage is marked by the solid line. Collection time of dust samples is marked by the dash lines. Data source: the National Oceanic and Atmospheric Administration (NOAA).

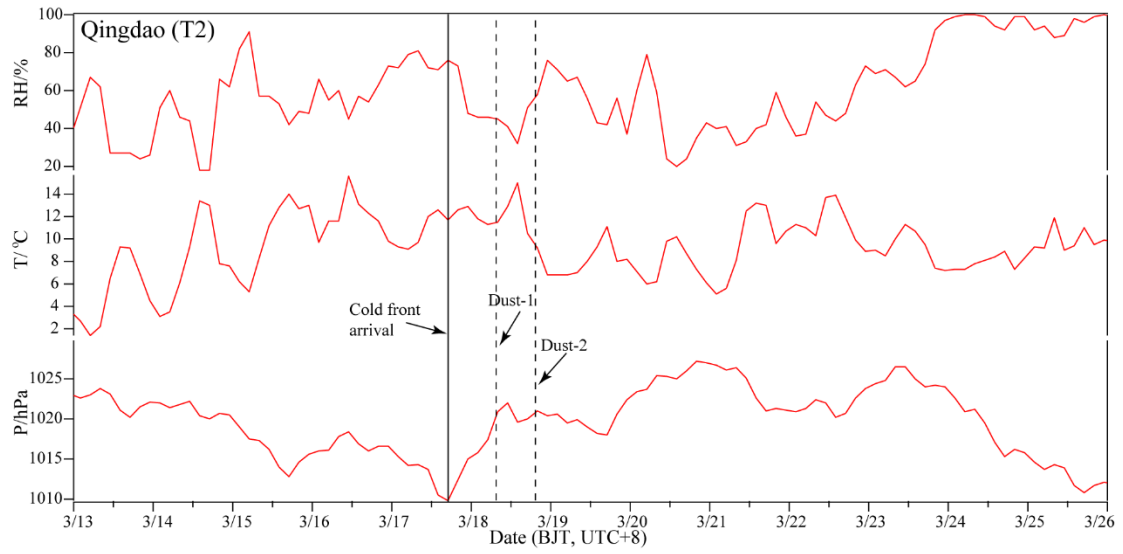

Figure S4. Time series of surface weather conditions: relative humidity (RH), temperature (T), and pressure (P) at Qingdao (T2). Data source: the National Oceanic and Atmospheric Administration (NOAA).

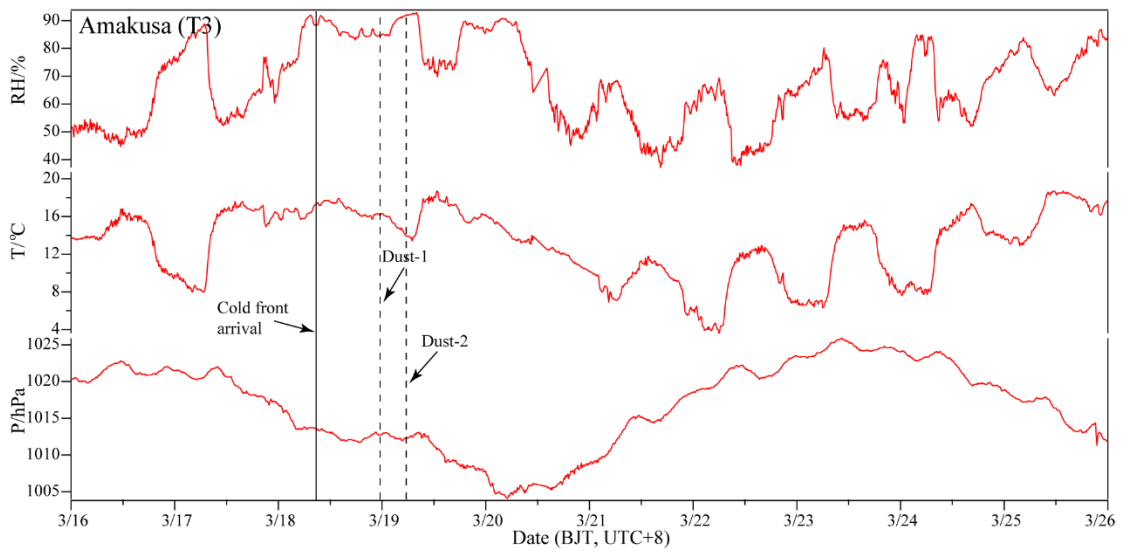

Figure S5. Time series of surface weather conditions: relative humidity (RH), temperature (T), and pressure (P) at Amakusa (T3).

## 2. The correlation between EVD and ECD obtained by AFM

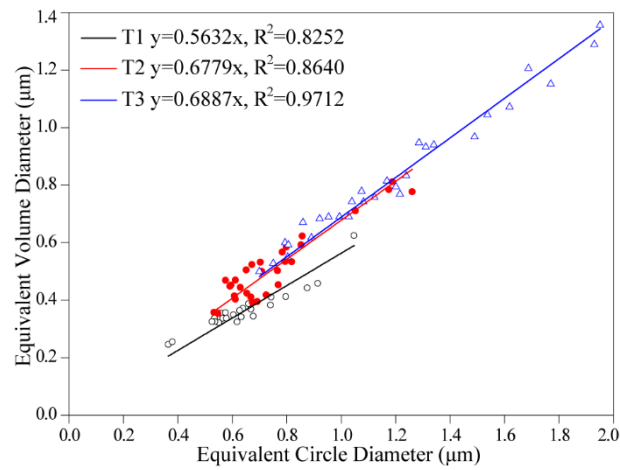

Figure S6. The correlation of equivalent circle diameter (ECD) and equivalent volume diameter (EVD) at three sampling sites obtained by AFM.

$$A = \pi r^2 = \pi \times \left(\frac{d}{2}\right)^2 = \frac{\pi d^2}{4} \rightarrow d = \sqrt{\frac{4A}{\pi}} \quad (1)$$

$$V = \frac{4}{3} \pi r^3 = \frac{4}{3} \times \frac{\pi D^3}{8} = \frac{\pi D^3}{6} \rightarrow D = \sqrt[3]{\frac{6V}{\pi}} \quad (2)$$

where  $d$  is the equivalent circle diameter (ECD) and  $D$  the equivalent volume diameter (EVD) (Chi et al., 2015).

## References

- Chi, J. W., Li, W. J., Zhang, D. Z., Zhang, J. C., Lin, Y. T., Shen, X. J., et al. (2015), Sea salt aerosols as a reactive surface for inorganic and organic acidic gases in the Arctic troposphere, *Atmospheric Chemistry and Physics*, 15(19), 11341-11353.
- Rolph, G., Stein, A., and Stunder, B. (2017), Real-time Environmental Applications and Display sYstem: READY, *Environmental Modelling & Software*, 95, 210-228.
